# Supplementary material
Source: ML conference proceedings conference paper supplement (https://openreview.net/forum?id=c0AD3ll9Wyv)
Supplement: supplementary_material [file attachment]

# APPENDIX TO “CAN LABEL-NOISE TRANSITION MATRIX HELP TO IMPROVE SAMPLE SELECTION AND LABEL CORRECTION?”

## APPENDIX A

In this section, we show all the proofs.

**Theorem 1.** *Let  $\mathbf{x}_1, \mathbf{x}_2$  be two examples such that  $\arg \max_{i \in \{0,1\}} P(Y = i|\mathbf{x}_1) = \arg \max_{j \in \{0,1\}} P(\tilde{Y} = j|\mathbf{x}_1) = 1$ ,  $\arg \max_{i \in \{0,1\}} P(Y = i|\mathbf{x}_2) = \arg \max_{j \in \{0,1\}} P(\tilde{Y} = j|\mathbf{x}_2) = 0$ , and  $P(Y = 0|\mathbf{x}_2) = P(Y = 1|\mathbf{x}_1)$ . If  $P(\tilde{Y} = 1|Y = 0) - P(\tilde{Y} = 0|Y = 1) > 0$ , then  $\min_{i \in \{0,1\}} \ell(f^*(\mathbf{x}_2), i) > \min_{i \in \{0,1\}} \ell(f^*(\mathbf{x}_1), i)$ .*

*Proof.*

$$\begin{aligned}
& P(\tilde{Y} = 0|\mathbf{x}_2) - P(\tilde{Y} = 1|\mathbf{x}_1) \\
&= P(\tilde{Y} = 0|Y = 0)P(Y = 0|\mathbf{x}_2) + P(\tilde{Y} = 0|Y = 1)P(Y = 1|\mathbf{x}_2) \\
&\quad - [P(\tilde{Y} = 1|Y = 0)P(Y = 0|\mathbf{x}_1) + P(\tilde{Y} = 1|Y = 1)P(Y = 1|\mathbf{x}_1)] \\
&= (1 - P(\tilde{Y} = 1|Y = 0))P(Y = 0|\mathbf{x}_2) + P(\tilde{Y} = 0|Y = 1)P(Y = 1|\mathbf{x}_2) \\
&\quad - [P(\tilde{Y} = 1|Y = 0)P(Y = 0|\mathbf{x}_1) + (1 - P(\tilde{Y} = 0|Y = 1))P(Y = 1|\mathbf{x}_1)] \\
&= (1 - P(\tilde{Y} = 1|Y = 0))P(Y = 0|\mathbf{x}_2) + P(\tilde{Y} = 0|Y = 1)P(Y = 1|\mathbf{x}_2) \\
&\quad - [P(\tilde{Y} = 1|Y = 0)P(Y = 0|\mathbf{x}_1) + (1 - P(\tilde{Y} = 0|Y = 1))P(Y = 1|\mathbf{x}_1)] \\
&= P(Y = 0|\mathbf{x}_2) - P(\tilde{Y} = 1|Y = 0)P(Y = 0|\mathbf{x}_2) + P(\tilde{Y} = 0|Y = 1)P(Y = 1|\mathbf{x}_2) \\
&\quad - [P(\tilde{Y} = 1|Y = 0)P(Y = 0|\mathbf{x}_1) + P(Y = 1|\mathbf{x}_1) - P(\tilde{Y} = 0|Y = 1)P(Y = 1|\mathbf{x}_1)] \\
&= P(Y = 1|\mathbf{x}_1) - P(\tilde{Y} = 1|Y = 0)P(Y = 1|\mathbf{x}_1) + P(\tilde{Y} = 0|Y = 1)(1 - P(Y = 1|\mathbf{x}_1)) \\
&\quad - [P(\tilde{Y} = 1|Y = 0)(1 - P(Y = 1|\mathbf{x}_1)) + P(Y = 1|\mathbf{x}_1) - P(\tilde{Y} = 0|Y = 1)P(Y = 1|\mathbf{x}_1)] \\
&= P(Y = 1|\mathbf{x}_1) - P(\tilde{Y} = 1|Y = 0)P(Y = 1|\mathbf{x}_1) + P(\tilde{Y} = 0|Y = 1) - P(\tilde{Y} = 0|Y = 1)P(Y = 1|\mathbf{x}_1) \\
&\quad - [P(\tilde{Y} = 1|Y = 0) - P(\tilde{Y} = 1|Y = 0)P(Y = 1|\mathbf{x}_1) + P(Y = 1|\mathbf{x}_1) - P(\tilde{Y} = 0|Y = 1)P(Y = 1|\mathbf{x}_1)] \\
&= P(\tilde{Y} = 0|Y = 1) - P(\tilde{Y} = 1|Y = 0) < 0. \tag{1}
\end{aligned}$$

Note that  $f^*$  is an optimal hypothesis which perfectly learns the noisy class posterior distribution. By employing the cross-entropy loss on  $f^*$ , we have

$$\ell(f^*(X), \tilde{Y}) = -\tilde{Y} \log(f^*(X)) - (1 - \tilde{Y}) \log(1 - f^*(X)) = -\log(P(\tilde{Y}|X)), \tag{2}$$

which is a non-increasing function. Therefore, the largest noisy class posterior has the minimum loss. Because  $\arg \max_{j \in \{0,1\}} P(\tilde{Y} = j|\mathbf{x}_2) = 0$ ,  $\arg \max_{i \in \{0,1\}} P(\tilde{Y} = i|\mathbf{x}_1) = 1$ , and  $P(\tilde{Y} = 0|\mathbf{x}_2) >$

$P(\tilde{Y} = 1|\mathbf{x}_1)$  by Eq. (1), then

$$\max(P(\tilde{Y} = 0|\mathbf{x}_2), P(\tilde{Y} = 1|\mathbf{x}_2), P(\tilde{Y} = 0|\mathbf{x}_1), P(\tilde{Y} = 1|\mathbf{x}_1)) = P(\tilde{Y} = 1|\mathbf{x}_1),$$

which implies that the minimum loss among those four noisy class posteriors is  $\ell(f^*(X = \mathbf{x}_1), \tilde{Y} = 1)$ . Therefore  $\min_{i \in \{0,1\}} \ell(f^*(\mathbf{x}_2), i) > \min_{i \in \{0,1\}} \ell(f^*(\mathbf{x}_1), i)$  holds, which completes the proof.  $\square$

**Theorem 2.** When  $P(\tilde{Y} = 1|Y = 0) - P(\tilde{Y} = 0|Y = 1) > 0$ , if an example  $\mathbf{x}_1$  such that  $0.5 < P(Y = 0|\mathbf{x}_1) < \frac{(1-2P(\tilde{Y}=0|Y=1))}{(1-2P(\tilde{Y}=1|Y=0))} P(Y = 1|\mathbf{x}_1)$ , then  $P(\tilde{Y} = 1|\mathbf{x}_1) > 0.5$ .

*Proof.*

$$\begin{aligned} & P(\tilde{Y} = 0|\mathbf{x}_1) - P(\tilde{Y} = 1|\mathbf{x}_1) \\ &= P(\tilde{Y} = 0|Y = 0)P(Y = 0|\mathbf{x}_1) + P(\tilde{Y} = 0|Y = 1)P(Y = 1|\mathbf{x}_1) \\ & \quad - [P(\tilde{Y} = 1|Y = 0)P(Y = 0|\mathbf{x}_1) + P(\tilde{Y} = 1|Y = 1)P(Y = 1|\mathbf{x}_1)] \\ &= (1 - P(\tilde{Y} = 1|Y = 0))P(Y = 0|\mathbf{x}_1) + P(\tilde{Y} = 0|Y = 1)P(Y = 1|\mathbf{x}_1) \\ & \quad - [P(\tilde{Y} = 1|Y = 0)P(Y = 0|\mathbf{x}_1) + (1 - P(\tilde{Y} = 0|Y = 1))P(Y = 1|\mathbf{x}_1)] \\ &= P(Y = 0|\mathbf{x}_1) - P(\tilde{Y} = 1|Y = 0)P(Y = 0|\mathbf{x}_1) + P(\tilde{Y} = 0|Y = 1)P(Y = 1|\mathbf{x}_1) \\ & \quad - [P(\tilde{Y} = 1|Y = 0)P(Y = 0|\mathbf{x}_1) + P(Y = 1|\mathbf{x}_1) - P(\tilde{Y} = 0|Y = 1)P(Y = 1|\mathbf{x}_1)] \\ &= (1 - 2P(\tilde{Y} = 1|Y = 0))P(Y = 0|\mathbf{x}_1) + (2P(\tilde{Y} = 0|Y = 1) - 1)P(Y = 1|\mathbf{x}_1). \end{aligned} \quad (3)$$

Let  $P(Y = 0|\mathbf{x}_1) < \frac{(1-2P(\tilde{Y}=0|Y=1))}{(1-2P(\tilde{Y}=1|Y=0))} P(Y = 1|\mathbf{x}_1)$ , by combining with Eq. (3), we have

$$\begin{aligned} & P(\tilde{Y} = 0|\mathbf{x}_1) - P(\tilde{Y} = 1|\mathbf{x}_1) \\ & < (1 - 2P(\tilde{Y} = 1|Y = 0)) \frac{(1 - 2P(\tilde{Y} = 0|Y = 1))}{(1 - 2P(\tilde{Y} = 1|Y = 0))} P(Y = 1|\mathbf{x}_1) + (2P(\tilde{Y} = 0|Y = 1) - 1)P(Y = 1|\mathbf{x}_1) \\ & < (1 - 2P(\tilde{Y} = 0|Y = 1))P(Y = 1|\mathbf{x}_1) + (2P(\tilde{Y} = 0|Y = 1) - 1)P(Y = 1|\mathbf{x}_1) < 0, \end{aligned} \quad (4)$$

which implies that  $P(\tilde{Y} = 1|\mathbf{x}_1) > 0.5$ . Let the Bayes label on the clean class-posterior distribution of  $\mathbf{x}_1$  be  $0^1$ , then  $0.5 < P(Y = 0|\mathbf{x}_1) < \frac{(1-2P(\tilde{Y}=0|Y=1))}{(1-2P(\tilde{Y}=1|Y=0))} P(Y = 1|\mathbf{x}_1)$ , which completes the proof.  $\square$

## REFERENCES

Mehryar Mohri, Afshin Rostamizadeh, and Ameet Talwalkar. *Foundations of machine learning*. MIT press, 2018.

<sup>1</sup>The Bayes label is the label with the largest class posterior. For example, the Bayes label on the clean class-posterior distribution  $Y^*$  of an instance  $\mathbf{x}$  is defined as  $Y^* = \arg \max_{i \in \{0,1\}} P(Y = i|\mathbf{x})$  Mohri et al. (2018)
